# Supplementary material for: Overnight Closed-Loop Insulin Delivery in Young People With Type 1 Diabetes: A Free-Living, Randomized Clinical Trial
Source: Oxford University Press journal article supplement (doi:10.2337/dc13-2644), 2014-04-10

SUPPLEMENTARY DATA

**Supplementary Table 1.** Failure analysis during closed loop.

|                                                    |           |
|----------------------------------------------------|-----------|
| <b>Number of nights when closed-loop turned on</b> | 311       |
| <b>Number of nights with</b>                       |           |
| 0 events                                           | 231 (74%) |
| 1 event                                            | 70 (23%)  |
| 2 events                                           | 8 (3%)    |
| 3 events                                           | 0         |
| 4 events                                           | 1 (<1%)   |
| 5 events                                           | 1 (<1%)   |
| <b>Total duration of closed-loop operation (h)</b> | 3053      |
| <b>Number of events<sup>a</sup></b>                |           |
| All reasons                                        | 95        |
| due to battery drained                             | 4         |
| due to Companion failure                           | 1         |
| due to basal profile changed                       | 1         |
| due to extended bolus changed by user              | 10        |
| due to temporary infusion changed by user          | 4         |
| due to sensor data unavailability                  | 29        |
| due to lack of pump connectivity                   | 36        |
| due to other reasons <sup>b</sup>                  | 10        |

<sup>a</sup> Event defined as undesirable stopping of closed-loop

<sup>b</sup> Other reasons include control algorithm device failure and unknown reasons

**Supplementary Table 2.** Primary outcome using adjusted sensor glucose values corroborated by unadjusted sensor glucose levels. Time when glucose in target between 23:00 and 07:00 during overnight closed loop insulin delivery (269 evaluable nights) and sensor-augmented insulin pump therapy (282 evaluable nights) is reported. Values are medians (interquartile ranges).

|                                        | Time (%) when overnight glucose in target range <sup>a</sup> |                         |                                    |        |
|----------------------------------------|--------------------------------------------------------------|-------------------------|------------------------------------|--------|
|                                        | Closed loop (N=16 subjects)                                  | Control (N=16 subjects) | Paired difference <sup>d</sup> (%) | P      |
| Adjusted sensor glucose <sup>b</sup>   | 64 (45 to 79)                                                | 47 (18 to 70)           | +15 (-9 to +43)                    | <0.001 |
| Unadjusted sensor glucose <sup>c</sup> | 68 (43 to 86)                                                | 46 (13 to 77)           | +19 (-12 to +50)                   | <0.001 |

<sup>a</sup> Target range 70 to 144mg/dl.

<sup>b</sup> Primary outcome: percentage calculated using adjusted sensor values.

<sup>c</sup> Secondary outcome corroboration: percentage using unadjusted glucose levels

<sup>d</sup> Closed loop minus insulin pump. Positive value indicates measurement was higher on nights of closed loop delivery compared with nights of pump therapy.

**Supplementary Table 3.** Outcomes using native CGM values.

|                                                | <b>Overnight closed loop (N = 16 subjects)</b> | <b>Control (N = 16 subjects)</b> | <b>Paired difference<sup>a</sup></b> | <b>P</b> |
|------------------------------------------------|------------------------------------------------|----------------------------------|--------------------------------------|----------|
| <b>From 23:00 to 07:00</b>                     |                                                |                                  |                                      |          |
| Number of evaluable nights                     | 269                                            | 282                              |                                      | –        |
| Time spent at glucose level (%) <sup>b</sup> : |                                                |                                  |                                      |          |
| 70 to 144mg/dl                                 | 68 (43 to 86)                                  | 46 (13 to 77)                    | +19 (–12 to +50)                     | <0.001   |
| 70 to 180 mg/dl                                | 89 (68 to 100)                                 | 73 (37 to 95)                    | +11 (–7 to +46)                      | <0.001   |
| < 54mg/dl                                      | 0.0 (0.0 to 0.0)                               | 0.0 (0.0 to 0.0)                 | 0.0 (0.0 to 0.0)                     | 0.05     |
| < 63mg/dl                                      | 0.0 (0.0 to 0.0)                               | 0.0 (0.0 to 0.0)                 | 0.0 (0.0 to 0.0)                     | 0.02     |
| < 70mg/dl                                      | 0.0 (0.0 to 0.2)                               | 0.0 (0.0 to 6.2)                 | 0.0 (–2.7 to 0.0)                    | <0.001   |
| > 144mg/dl                                     | 28.3 (11.0 to 51.8)                            | 43.2 (11.4 to 86.7)              | –13.2 (–49.7 to +15.9)               | <0.001   |
| > 180mg/dl                                     | 6.2 (0.0 to 27.9)                              | 13.3 (0.0 to 58.8)               | –0.6 (–42.2 to +7.9)                 | <0.001   |
| > 300mg/dl                                     | 0.0 (0.0 to 0.0)                               | 0.0 (0.0 to 0.0)                 | 0.0 (0.0 to 0.0)                     | 0.87     |
| <b>From midnight to midnight (24 hours)</b>    |                                                |                                  |                                      |          |
| Number of evaluable days                       | 252                                            | 264                              |                                      | –        |
| Time spent at glucose level (%) <sup>b</sup> : |                                                |                                  |                                      |          |
| 70 to 144mg/dl                                 | 51 (37 to 64)                                  | 40 (23 to 56)                    | +11 (–7 to +28)                      | <0.001   |
| 70 to 180 mg/dl                                | 70 (56 to 83)                                  | 61 (44 to 76)                    | +8 (–7 to +25)                       | <0.001   |
| < 54mg/dl                                      | 0.0 (0.0 to 0.0)                               | 0.0 (0.0 to 1.3)                 | 0.0 (–0.2 to 0.0)                    | 0.05     |
| < 63mg/dl                                      | 0.0 (0.0 to 1.9)                               | 0.0 (0.0 to 4.0)                 | 0.0 (–1.9 to +0.8)                   | 0.11     |
| < 70mg/dl                                      | 1.3 (0.0 to 4.0)                               | 1.7 (0.0 to 8.1)                 | 0.0 (–4.2 to +2.1)                   | 0.10     |
| > 144mg/dl                                     | 45.7 (31.6 to 60.3)                            | 53.5 (35.7 to 75.6)              | –9.2 (–28.2 to +9.9)                 | <0.001   |
| > 180mg/dl                                     | 25.1 (12.9 to 41.7)                            | 33.0 (17.0 to 52.7)              | –6.4 (–25.1 to +9.5)                 | <0.001   |
| > 300mg/dl                                     | 0.0 (0.0 to 3.4)                               | 0.0 (0.0 to 4.7)                 | 0.0 (–2.1 to +0.6)                   | 0.61     |

Data are mean (SD) or median (interquartile range).

<sup>a</sup> Closed loop minus control. A positive value indicates the value was higher on the closed loop compared with control.

<sup>b</sup> Percentage time calculated using conservatively corrected sensor values.

SUPPLEMENTARY DATA

**Supplementary Table 4.** Safety evaluation.

|                                                                      | <b>Overnight closed loop<br/>(N = 16 subjects)</b> | <b>Control<br/>(N = 16 subjects)</b> |
|----------------------------------------------------------------------|----------------------------------------------------|--------------------------------------|
| <b>Number of severe hypoglycaemia</b>                                | 0                                                  | 0                                    |
| <b>Number of subjects experiencing severe hypoglycaemia</b>          | 0                                                  | 0                                    |
| <b>Number of elevated ketones measurements<sup>a</sup></b>           | 2                                                  | 2                                    |
| <b>Number of subjects experiencing elevated ketones measurements</b> | 2                                                  | 1                                    |

<sup>a</sup> Ketones > 1.5mmol/l

**Supplementary Table S5.** Weekly trends during overnight closed-loop insulin delivery.

|                                                | <b>Week 1<br/>(N = 16 subjects)</b> | <b>Week 2<br/>(N = 16 subjects)</b> | <b>Week 3<br/>(N = 16 subjects)</b> |
|------------------------------------------------|-------------------------------------|-------------------------------------|-------------------------------------|
| <b>From 23:00 to 07:00</b>                     |                                     |                                     |                                     |
| Number of evaluable nights                     | 88                                  | 90                                  | 91                                  |
| Time spent at glucose level (%) <sup>a</sup> : |                                     |                                     |                                     |
| 70 to 144mg/dl                                 | 64 (42 to 81)                       | 65 (47 to 81)                       | 64 (46 to 77)                       |
| < 70mg/dl                                      | 0.1 (0.0 to 0.2)                    | 0.1 (0.0 to 0.5)                    | 0.1 (0.0 to 0.4)                    |
| > 144mg/dl                                     | 31.0 (17.4 to 55.2)                 | 27.5 (13.6 to 49.0)                 | 30.1 (15.3 to 50.3)                 |
| Basal insulin delivery (U)                     | 8.6 (6.7 to 11.1)                   | 7.7 (6.3 to 10.1)                   | 8.4 (6.4 to 10.8)                   |
| Bolus insulin delivery (U)                     | 0 (0 to 0)                          | 0 (0 to 0)                          | 0 (0 to 0)                          |
| Total insulin delivery (U)                     | 9.3 (7.0 to 13.1)                   | 8.1 (6.5 to 11.1)                   | 8.9 (6.8 to 12.8)                   |
| <b>From midnight to midnight (24 hours)</b>    |                                     |                                     |                                     |
| Number of evaluable days                       | 87                                  | 89                                  | 76                                  |
| Time spent at glucose level (%) <sup>a</sup> : |                                     |                                     |                                     |
| 70 to 144mg/dl                                 | 47 (35 to 61)                       | 51 (40 to 61)                       | 50 (39 to 61)                       |
| < 70mg/dl                                      | 0.3 (0.1 to 1.0)                    | 0.4 (0.1 to 1.6)                    | 0.4 (0.1 to 1.0)                    |
| > 144mg/dl                                     | 47.9 (34.1 to 60.8)                 | 46.0 (30.6 to 57.5)                 | 45.5 (33.8 to 58.2)                 |
| Basal insulin delivery (U)                     | 24.3 (18.9 to 32.4)                 | 23.3 (18.0 to 29.0)                 | 21.4 (17.7 to 29.8)                 |
| Bolus insulin delivery (U)                     | 23.2 (19.3 to 33.3)                 | 24.6 (19.7 to 32.8)                 | 26.5 (20.7 to 33.2)                 |
| Total insulin delivery (U)                     | 49.0 (39.4 to 63.5)                 | 50.3 (39.6 to 57.1)                 | 51.2 (39.9 to 61.7)                 |

Data are mean (SD) or median (interquartile range).

<sup>a</sup> Percentage time calculated using conservatively corrected sensor values.

SUPPLEMENTARY DATA

**Supplementary Table 6.** Outcomes using native CGM values from 0200 to 0700.

|                            |                                                | <b>Overnight closed loop<br/>(N = 16 subjects)</b> | <b>Control<br/>(N = 16 subjects)</b> | <b>Paired difference<sup>a</sup></b> | <b>P</b> |
|----------------------------|------------------------------------------------|----------------------------------------------------|--------------------------------------|--------------------------------------|----------|
| <b>From 02:00 to 07:00</b> |                                                |                                                    |                                      |                                      |          |
|                            | Time spent at glucose level (%) <sup>b</sup> : |                                                    |                                      |                                      |          |
|                            | 70 to 144mg/dl                                 | 84 (60 to 100)                                     | 46 (3 to 89)                         | +30 (-3 to +70)                      | <0.001   |
|                            | 70 to 180 mg/dl                                | 100 (88 to 100)                                    | 81 (29 to 100)                       | +10 (0 to +59)                       | <0.001   |
|                            | < 54mg/dl                                      | 0.0 (0.0 to 0.0)                                   | 0.0 (0.0 to 0.0)                     | 0.0 (0.0 to 0.0)                     | 0.05     |
|                            | < 63mg/dl                                      | 0.0 (0.0 to 0.0)                                   | 0.0 (0.0 to 0.0)                     | 0.0 (0.0 to 0.0)                     | 0.04     |
|                            | < 70mg/dl                                      | 0.0 (0.0 to 0.0)                                   | 0.0 (0.0 to 0.0)                     | 0.0 (0.0 to 0.0)                     | 0.02     |
|                            | > 144mg/dl                                     | 9.0 (0.0 to 34.2)                                  | 40.9 (0.0 to 96.7)                   | -18.3 (-70.4 to +4.7)                | <0.001   |
|                            | > 180mg/dl                                     | 0.0 (0.0 to 4.0)                                   | 0.0 (0.0 to 61.1)                    | 0.0 (-54.2 to 0.0)                   | <0.001   |
|                            | > 300mg/dl                                     | 0.0 (0.0 to 0.0)                                   | 0.0 (0.0 to 0.0)                     | 0.0 (0.0 to 0.0)                     | 0.47     |

Data are mean (SD) or median (interquartile range).

<sup>a</sup> Closed loop minus control. A positive value indicates the value was higher on the closed loop compared with control.

<sup>b</sup> Percentage time calculated using conservatively corrected sensor values.

## SUPPLEMENTARY DATA

**Supplementary Table 7.** List of competencies assessed at the end of training on closed loop system.

- Switching \*CAD ON/OFF
- Checking battery level on CAD
- Awareness of importance of connecting CAD to mains power with lead provided overnight
- Connecting CAD to Companion via USB cable
- Being aware of keeping the CAD and DANA-R insulin pump as close together as possible to ensure connectivity
- Checking if Companion is connected on CAD screen
- Starting closed-loop
- Stopping closed-loop
- Understanding “Hypo alarms will be switched-off” message
- Understanding meaning of “Suspended closed-loop” mode and “Cannot continue-reverted to open loop”
- Understanding how to check alarms audio
- Understanding the concept of closed-loop delivery
- Understanding information on DANA-R pump screen during closed-loop delivery
- Understanding you must deliver a manual bolus with food
- Understanding the process of delivering a meal bolus during closed-loop
- Understanding the importance of calibration checks
- Understanding the importance of alarms being switched ON on the Companion during closed-loop

\*CAD stands for control algorithm device (ultraportable OQO laptop)

**Supplementary Figure 1.** Flow of participants through the trial.

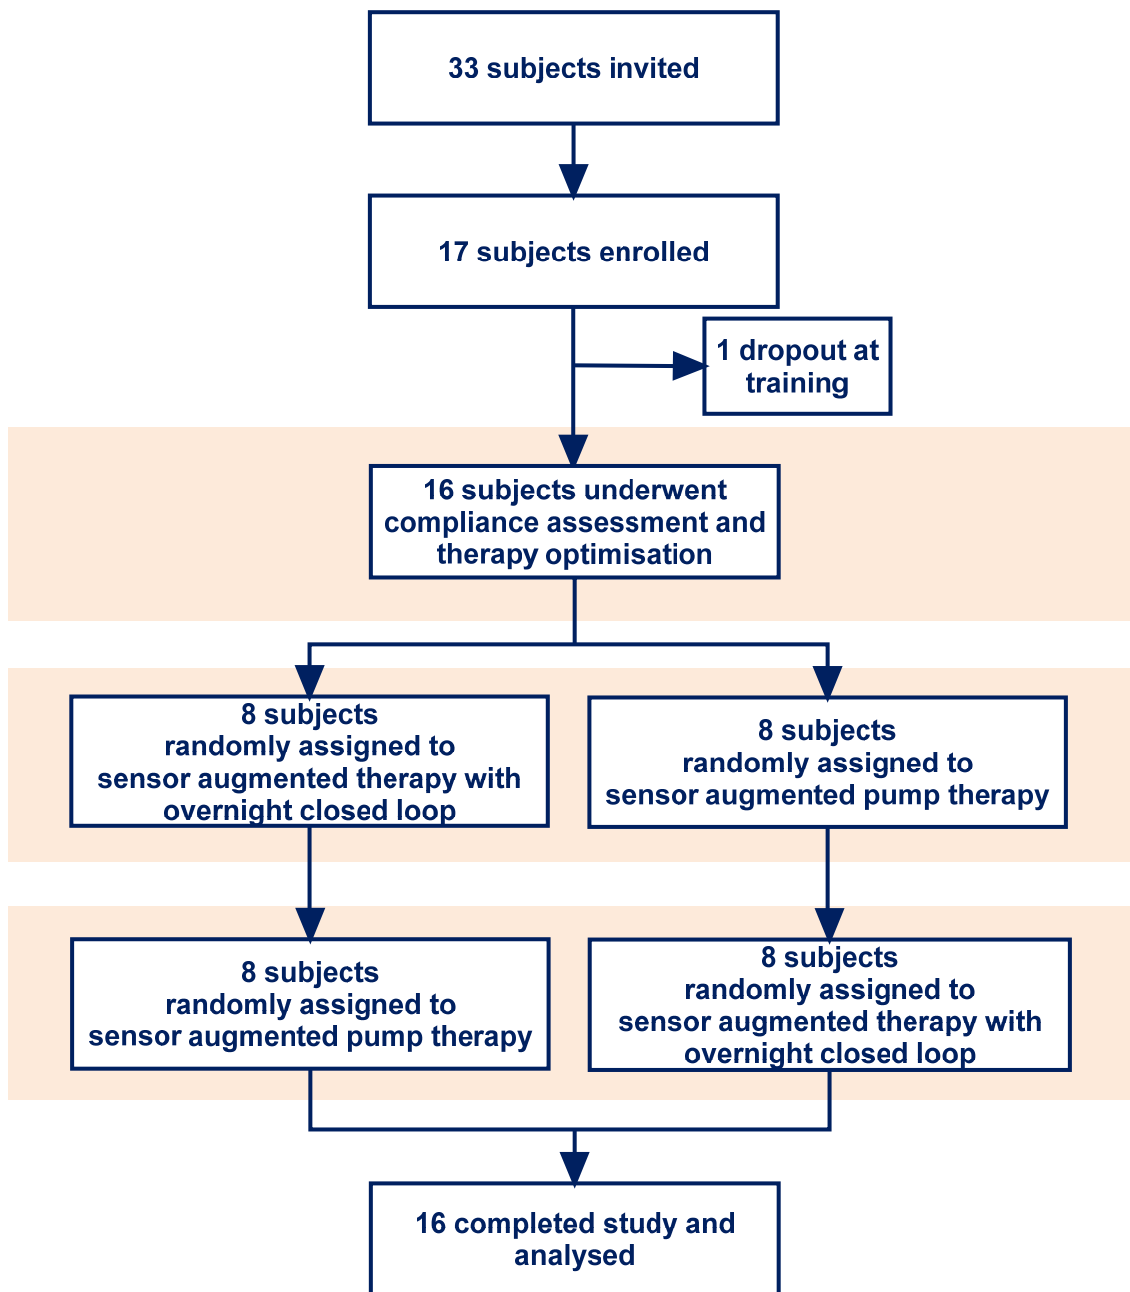

SUPPLEMENTARY DATA

**Supplementary Figure 2.** Overnight closed loop during a sample study night. Closed loop started at 21:40 and stopped at 07:30. Continuous glucose measurements are shown by light red squares, fingerstick calibration check is shown by a dark square (21:10), insulin delivery is shown by heavy blue line, and preprogrammed insulin delivery (not administered but shown for illustration) by thin blue line. The target range between 3.9 and 8.0mmol/l (70 and 144mg/dl) is denoted by dashed red line.

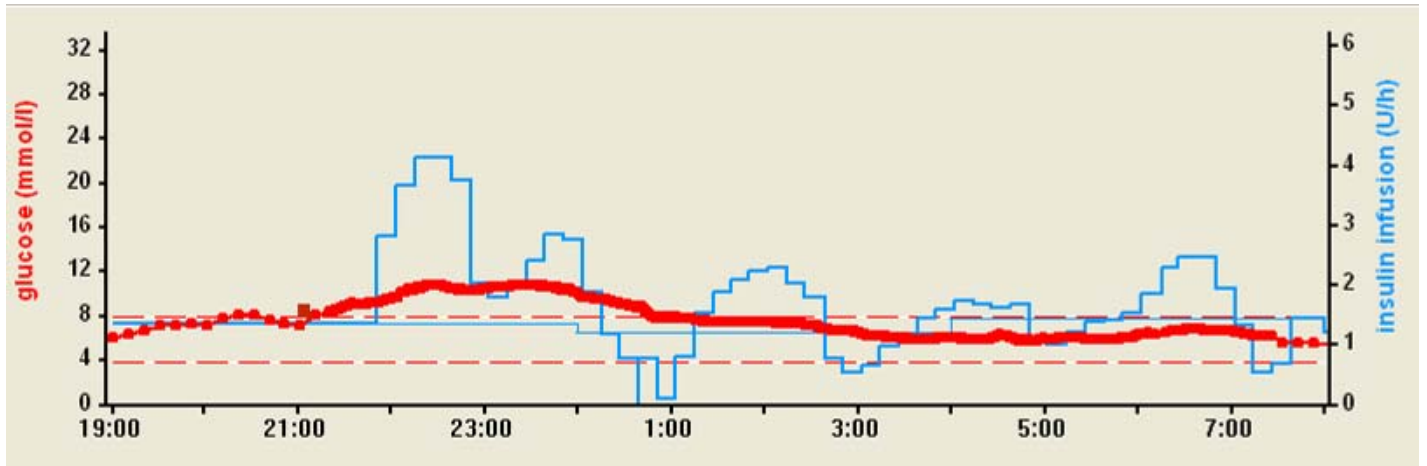

SUPPLEMENTARY DATA

**Supplementary Figure 3.** 24hour profiles of sensor glucose (top panel) and insulin delivery (bottom panel) during closed loop and control. The target glucose range 70 to 144 mg/dl is denoted by the dashed lines. Median [interquartile range] is shown.

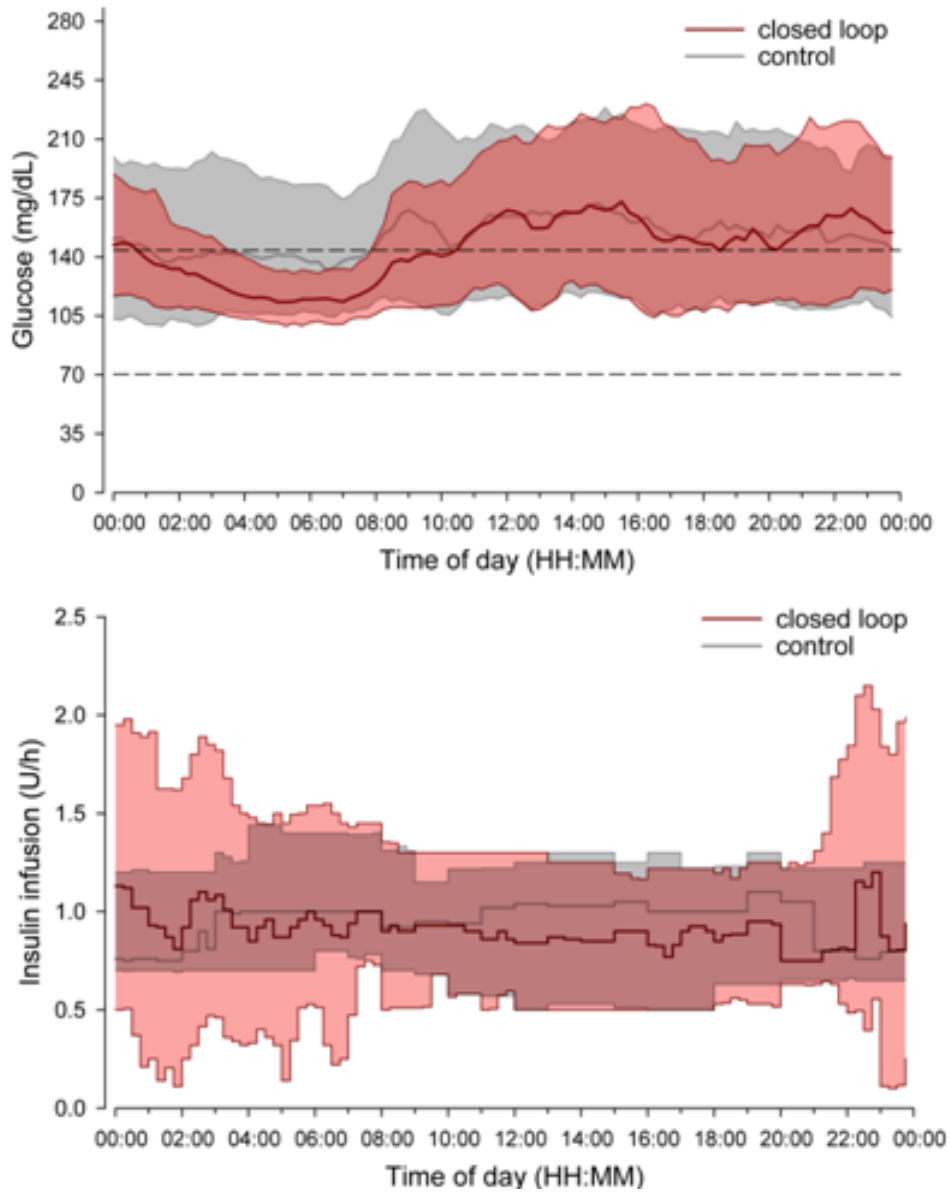

Supplement: dc132644supplementarydata.pdf [file dc132644supplementarydata.pdf]
